# Supplementary material for: Stimulus representation in human frontal cortex supports flexible control in working memory
Source: eLife. 2025 Apr 24;13:RP100287. doi: 10.7554/eLife.100287 (PMC12021415; doi:10.7554/eLife.100287)
Supplement: Figure 2—source data 1. — Underline denotes significant results (p<0.05). [file elife-100287-fig2-data1.xlsx]

## Sheet: Figure 2-source data 1
	Maintenance			Categorization			Maintenance vs.
Time							Categorization
	EVC	IPS	sPCS	EVC	IPS	sPCS	EVC	IPS	sPCS
0	0.486	0.389	0.286	0.838	0.838	0.747	0.206	0.814	0.827
1	0.385	0.576	0.743	0.747	0.822	0.717	0.205	0.675	0.46
2	0.06	0.286	0.219	0.174	0.626	0.626	0.188	0.788	0.779
3	0	0.286	0.764	0	0.353	0.389	0.497	0.63	0.232
4	0	0.154	0.422	0	0.038	0.784	0.534	0.299	0.812
5	0	0.042	0.618	0	0.027	0.269	0.816	0.389	0.241
6	0	0.002	0.094	0	0.002	0.056	0.927	0.528	0.594
7	0	0	0.033	0	0	0.001	0.914	0.301	0.274
8	0	0	0.001	0	0	0.001	0.588	0.651	0.655
9	0	0	0.004	0	0	0.007	0.119	0.277	0.399
10	0	0	0.06	0	0	0.003	0.007	0.258	0.127
11	0	0.001	0.264	0	0	0.032	0.001	0.162	0.123
12	0	0.003	0.759	0	0	0.039	0	0.09	0.018
13	0	0.001	0.377	0	0	0.003	0	0.054	0.022
14	0	0.007	0.747	0	0	0.038	0	0.046	0.034
15	0	0	0.667	0	0	0.003	0	0.145	0.012
16	0	0	0.948	0	0	0.02	0	0.19	0.001
17	0	0	0.838	0	0	0.031	0	0.889	0.004
