# Supplementary material for: Stimulus representation in human frontal cortex supports flexible control in working memory
Source: eLife. 2025 Apr 24;13:RP100287. doi: 10.7554/eLife.100287 (PMC12021415; doi:10.7554/eLife.100287)
Supplement: Figure 3—source data 1. — Underline denotes significant results (p<0.05). [file elife-100287-fig3-data1.xlsx]

## Sheet: Figure 3-source data 1
Time	Maintenance			Categorization
	EVC	IPS	sPCS	EVC	IPS	sPCS
0	0.569	0.202	0.603	0.674	0.347	0.368
1	0.866	0.549	0.871	0.913	0.459	0.291
2	0.757	0.808	0.846	0.921	0.651	0.224
3	0.246	0.264	0.576	0.438	0.708	0.075
4	0.232	0.147	0.749	0.092	0.052	0.093
5	0.31	0.062	0.537	0.136	0.032	0.033
6	0.114	0.049	0.911	0.045	0.003	0.009
7	0.012	0.024	0.125	0.019	0.002	0.012
8	0.034	0.076	0.14	0.022	0.001	0.004
9	0.05	0.069	0.143	0.027	0	0.001
10	0.16	0.699	0.377	0.101	0	0
11	0.32	0.944	0.612	0.14	0.015	0.004
12	0.494	0.983	0.339	0.271	0.027	0.007
13	0.344	0.546	0.14	0.435	0.062	0.009
14	0.173	0.768	0.538	0.275	0.082	0.068
15	0.127	0.809	0.811	0.493	0.181	0.08
16	0.083	0.145	0.516	0.284	0.097	0.032
17	0.396	0.085	0.03	0.122	0.042	0.118
