# Supplementary material for: Stimulus representation in human frontal cortex supports flexible control in working memory
Source: eLife. 2025 Apr 24;13:RP100287. doi: 10.7554/eLife.100287 (PMC12021415; doi:10.7554/eLife.100287)
Supplement: Figure 4—source data 1. — Underline denotes significant results (p<0.05). [file elife-100287-fig4-data1.xlsx]

## Sheet: Figure 4-source data 1
	Maintenance			Categorization			Maintenance vs.
Time							Categorization
	EVC	IPS	sPCS	EVC	IPS	sPCS	EVC	IPS	sPCS
0	0.005	0.028	0.203	0.511	0.359	0.395	0.007	0.976	0.804
1	0.007	0.09	0.079	0.339	0.181	0.412	0.018	0.81	0.979
2	0.001	0.152	0.444	0.154	0.371	0.548	0.021	0.816	0.668
3	0	0.079	0.481	0	0.237	0.6	0.057	0.851	0.669
4	0	0.021	0.17	0	0.001	0.224	0.385	0.578	0.675
5	0	0.018	0.548	0	0	0.045	0.578	0.396	0.071
6	0	0.006	0.525	0	0	0	0.811	0.197	0.002
7	0	0	0.018	0	0	0	0.9	0.275	0.072
8	0	0	0.152	0	0	0	0.884	0.059	0.011
9	0	0	0.117	0	0	0	0.612	0.09	0.04
10	0	0	0.028	0	0	0	0.045	0.207	0.066
11	0	0.001	0.017	0	0	0	0.005	0.272	0.209
12	0	0	0.028	0	0	0	0.014	0.574	0.266
13	0	0.001	0.052	0	0	0	0.029	0.344	0.139
14	0	0.001	0.117	0	0	0.021	0.12	0.42	0.395
15	0	0.002	0.022	0	0	0.005	0.001	0.644	0.34
16	0	0	0.003	0	0	0	0	0.866	0.546
17	0	0	0.039	0	0	0	0	0.881	0.259
